# Supplementary material
Source: HighWire-hosted journal article supplement (https://bmjopen.bmj.com/content/12/6/e062524)
Supplement: inline-supplementary-material-1 [file inline-supplementary-material-1.pdf]

### FIT After Surgery Study Investigators

1. **Project Office Operations Committee:** D N Wijeysondera (Co-Principal Investigator), D I McIsaac (Co-Principal Investigator), K S Ladha, J F Daza, J Pazmino-Canizares, G Mattina, E Hladkowitz, M Tessier, S Ehtesham, S Nnorom
2. **Steering Committee:** D N Wijeysondera (Co-Principal Investigator), D I McIsaac (Co-Principal Investigator), S M H Alibhai (Co-Principal Investigator), P Jüni, K S Ladha, C D Mazer, M Puts, G Lebovic, T R Chesney, A C Wei, S Ehtesham
3. **Study Site Investigators**

*St. Michael's Hospital (Toronto, Ontario):* D N Wijeysondera (Site Lead), K S Ladha (Site Co-Lead), C D Mazer, J Daza, J Pazmino-Canizares, G Mattina, S Drozd, C Hanley, D Sussman, T R Chesney, M Louridas, C Wong

*The Ottawa Hospital – Civic and General Sites (Ottawa, Ontario):* D I McIsaac (Site Lead), R H Breau (Site Co-Lead), M Lalu (Site Co-Lead), S Abdellatif, S Gagne, E Hladkowitz

*Centre Hospitalier de l'Université de Montréal (Montreal, Quebec):* E Duceppe (Site Lead)

*Foothills Medical Centre (Calgary, Alberta):* M Davis (Site Lead), K Zarnke (Site Co-Lead), M Bosch (Site Co-Lead)

*Humber River Hospital (Toronto, Ontario):* S Avremescu (Site Lead)

*Juravinski Hospital (Hamilton, Ontario):* P Serrano (Site Lead)

*Kingston Health Sciences Centre (Kingston, Ontario):* J Van Vlymen (Site Lead), D Dumerton, M Karizhenskaia

*Mississauga Hospital (Mississauga, Ontario):* H El Beheiry (Site Lead)

*Mount Sinai Hospital (Toronto, Ontario):* N Siddiqui (Site Lead), E Kennedy

*Queen Elizabeth II Health Sciences Centre (Halifax, Nova Scotia):* D MacDonald (Site Lead), R Spence, F Bonazza, A Zahavich

*St. Boniface Hospital (Winnipeg, Manitoba):* E Jacobsohn (Site Lead), M Thorleifson (Site Co-Lead), S L Russell (Site Co-Lead), H Bagry (Site Co-Lead),

*St. Paul's Hospital (Vancouver, British Columbia):* S Y MacDonell (Site Lead), V Lyon, T Barnes, J Dale-Gandar

*Sunnybrook Health Sciences Centre (Toronto, Ontario):* S Choi (Site Co-Lead), A Jerath (Site Co-Lead), L Kaustov, A Fleet, S Shaeen

*Toronto Western Hospital (Toronto, Ontario):* G Lorello (Site Lead), E Al Azazi

*Toronto General Hospital (Toronto, Ontario):* M Parotto (Site Lead), S A McCluskey (Site Co-Lead), H Poonawala

*University of Alberta Hospital (Edmonton, Alberta):* D Dillane (Site Lead)
